# Supplementary material for: An efficient aqueous phase synthesis of benzimidazoles/benzothiazoles in the presence of β-cyclodextrin
Source: Royal Society of Chemistry journal article supplement (doi:10.1039/c4ra16222f), 2015-01-01

## **Supporting Information**

### **An efficient aqueous phase synthesis of benzimidazoles/benzothiazoles in the presence of $\beta$ -cyclodextrin.**

Ramesh Katla,<sup>a</sup> Rakhi Chowrasia,<sup>b</sup> Padma Sunitha Manjari,<sup>b</sup> Nelson Luís C. Domingues,<sup>a\*</sup>

<sup>a</sup>*Organic Catalysis and Biocatalysis Laboratory, OCBL/FACET, Federal University of Grande Dourados—UFGD,  
Dourados/Itahúm rod. km 12 s/n, Zip Code 79804-970, Dourados, MS, Brazil.*

<sup>b</sup>*Department of Chemistry, Osmania University, Hyderabad, India-500004.*

*E-mail: [nelsondomingues@ufgd.edu.br](mailto:nelsondomingues@ufgd.edu.br)*

## **Supporting Information**

### **Contents**

**General Information.....2**

**Copies of <sup>1</sup>HNMR and <sup>13</sup>CNMR of Compounds.....3-19**

**General Information:**

All the chemicals were purchased from Sigma Aldrich with purity not less than 99.9%. Analytical Thin Layer Chromatography (TLC) was carried out by using silica gel 60 F254 pre-coated plates. Visualization was accomplished with UV lamp of I<sub>2</sub> stain. All the products were characterized by their NMR and Mass spectra. <sup>1</sup>H NMR and <sup>13</sup>C NMR were recorded on 200 or 300 MHz, in CDCl<sub>3</sub>, and the chemical shifts were reported in parts per million (ppm, δ) downfield from the tetramethylsilane.

# Copies of $^1\text{H}$ NMR and $^{13}\text{C}$ NMR of Compounds

## Table 1, Entry 1

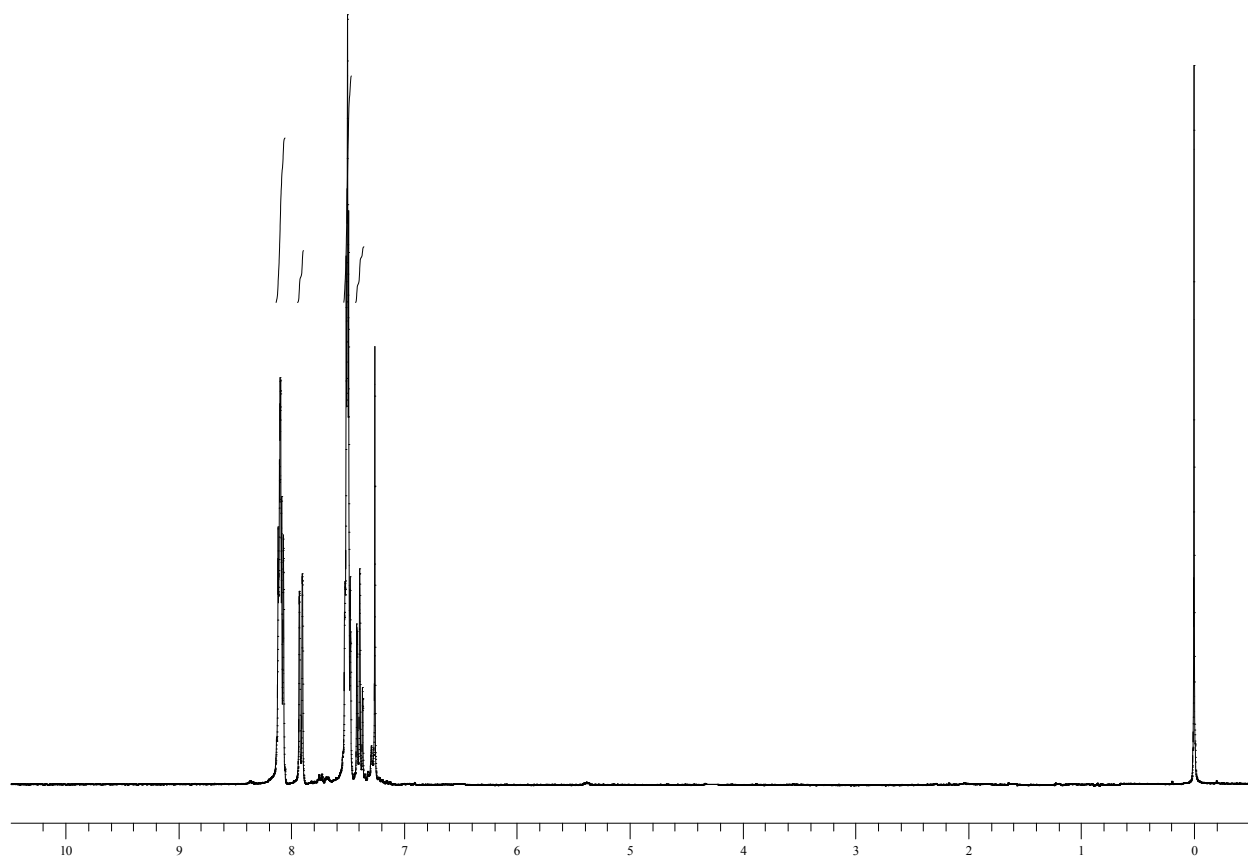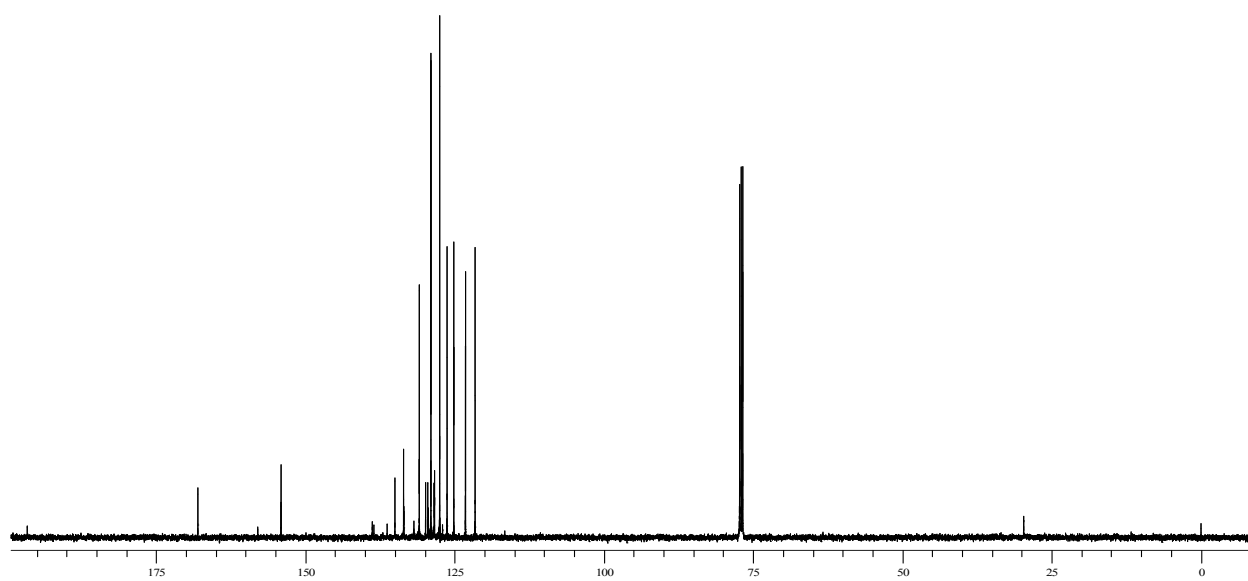

Table 1, Entry 2

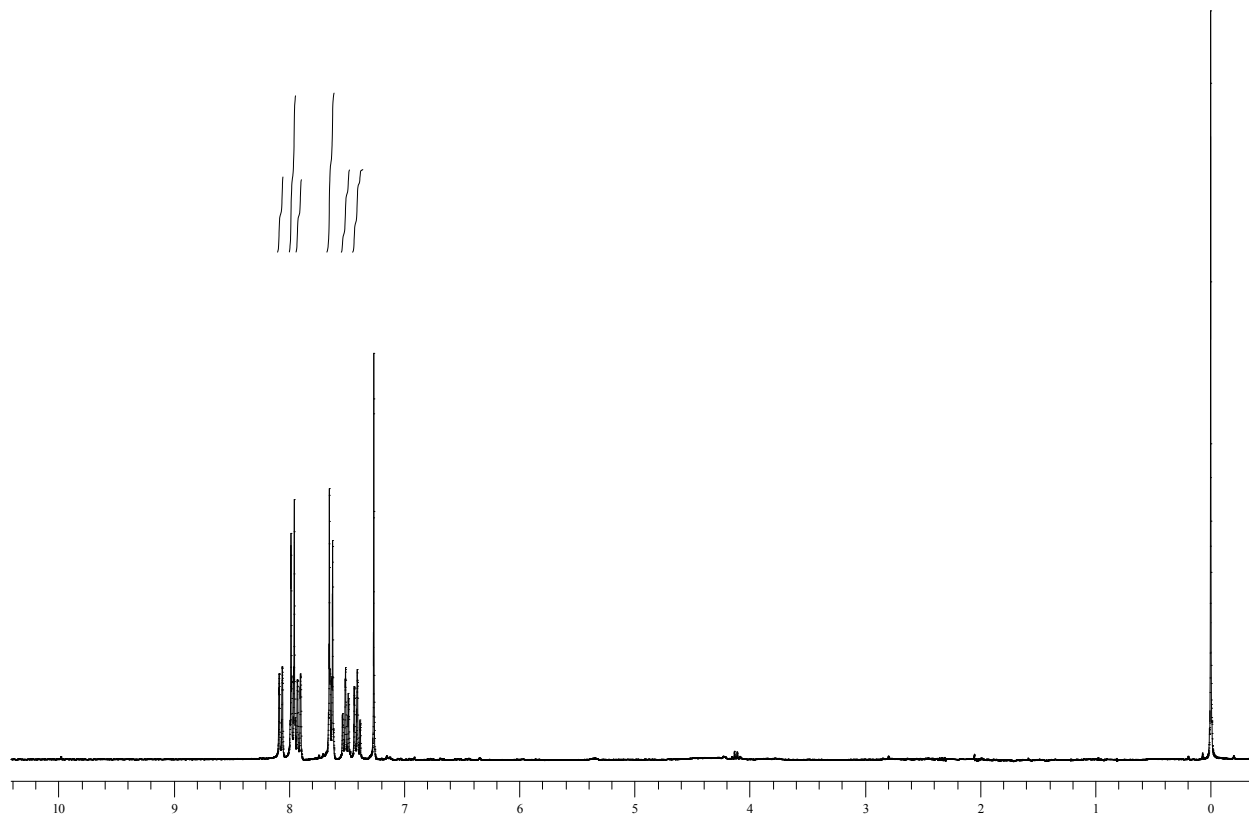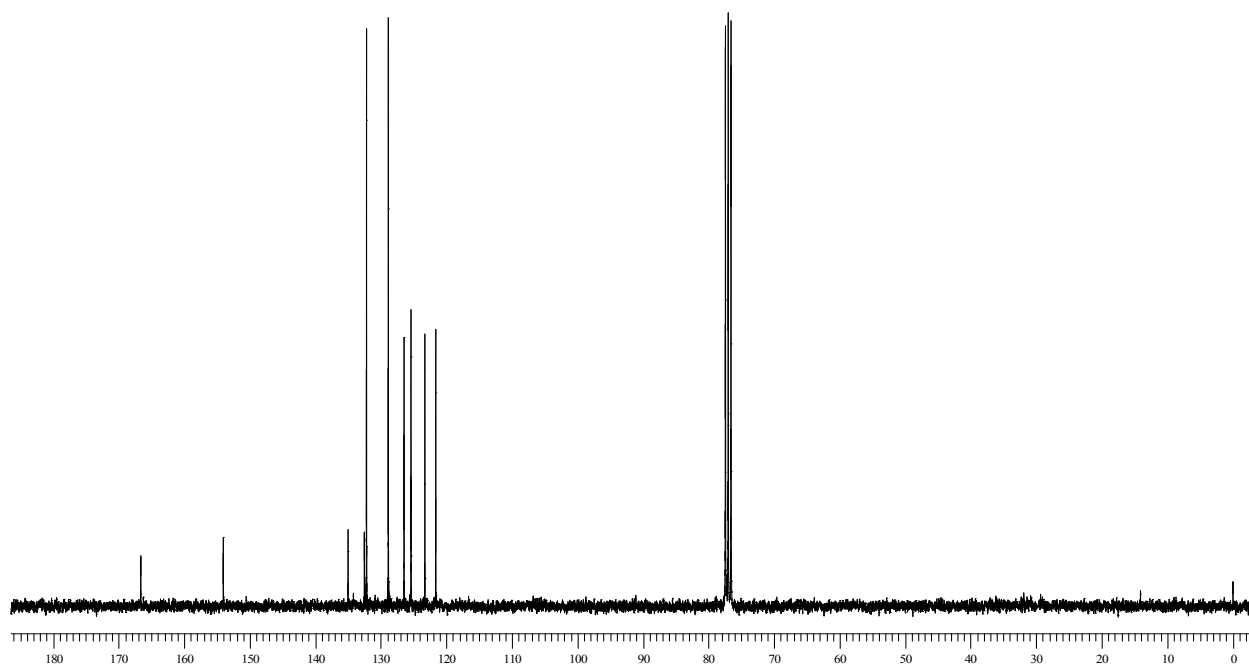

Table 1, Entry 3

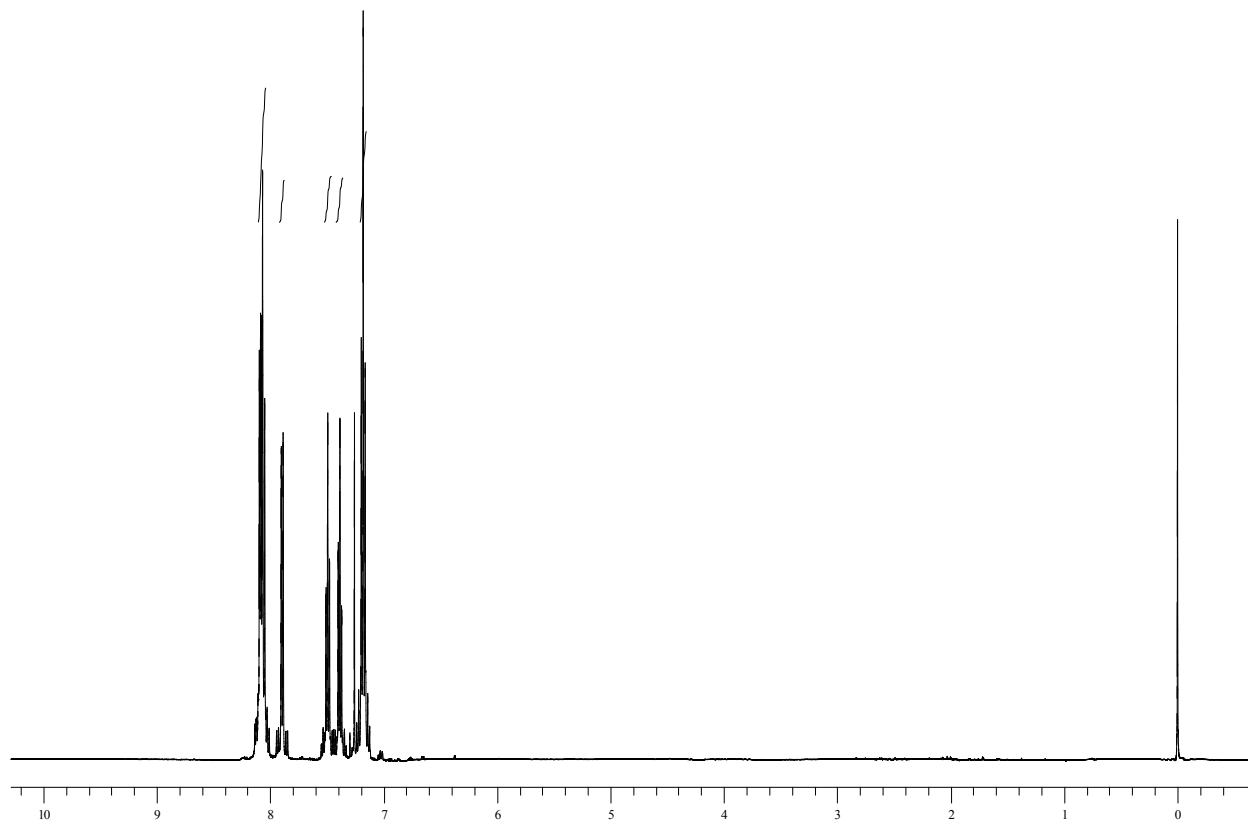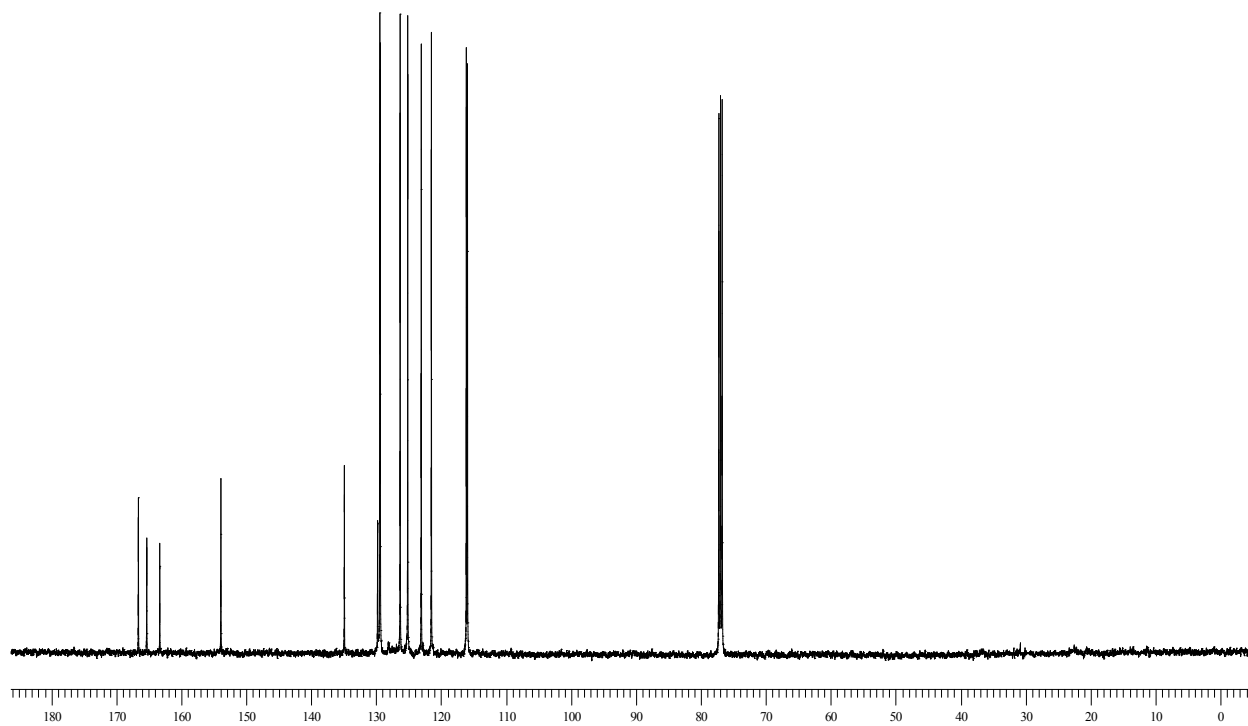

Table 1, Entry 4

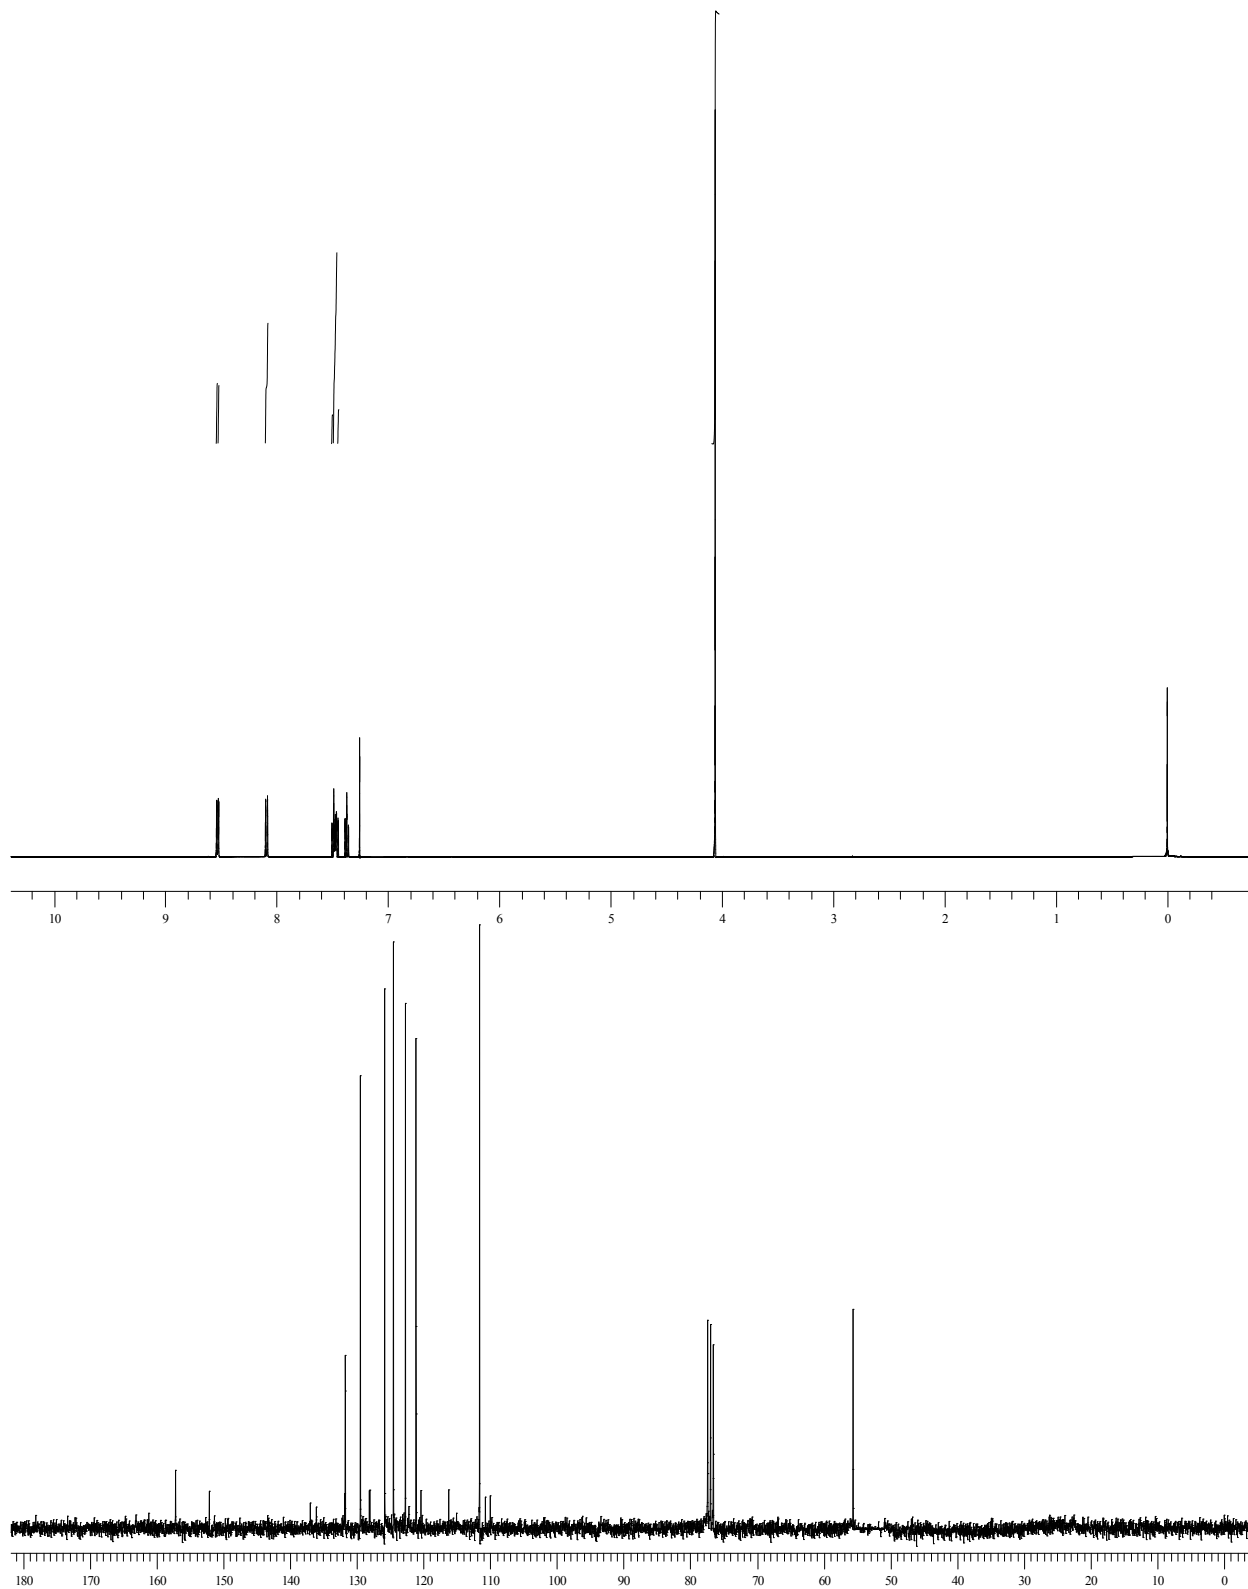

**Table 1, Entry 5**

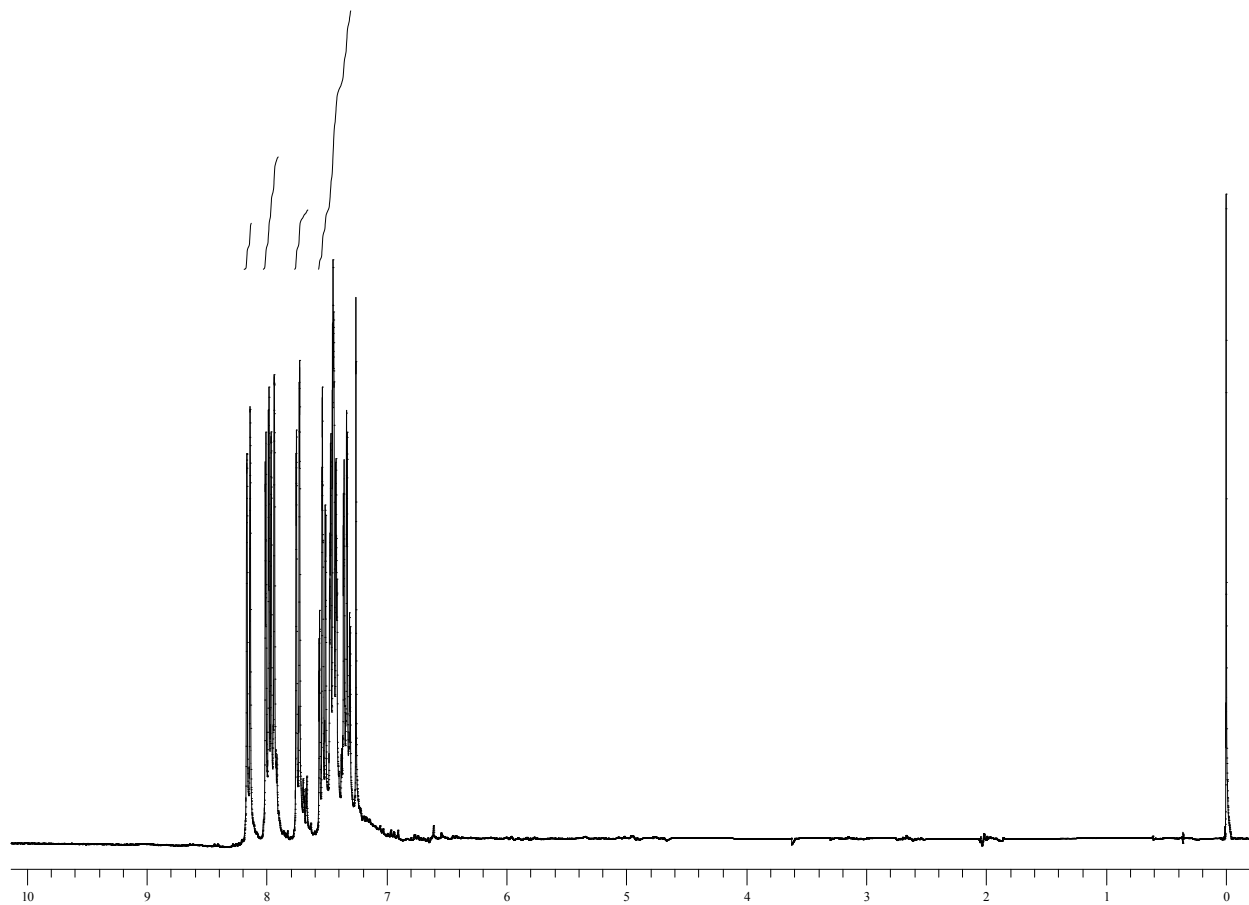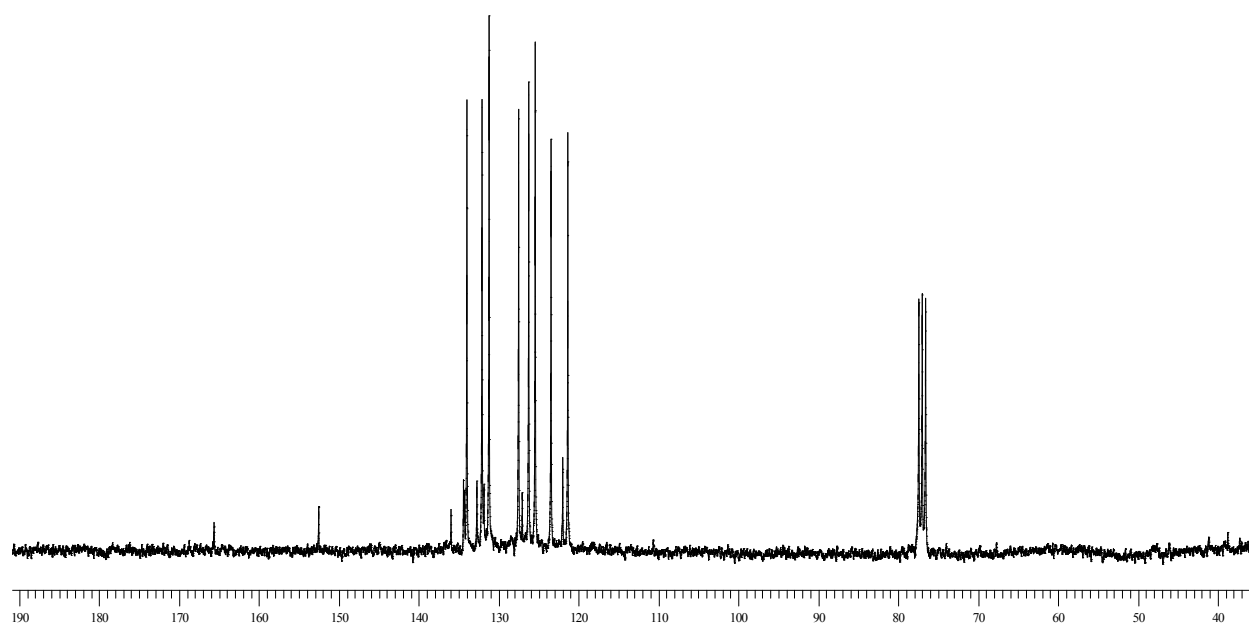

**Table 1, Entry 6**

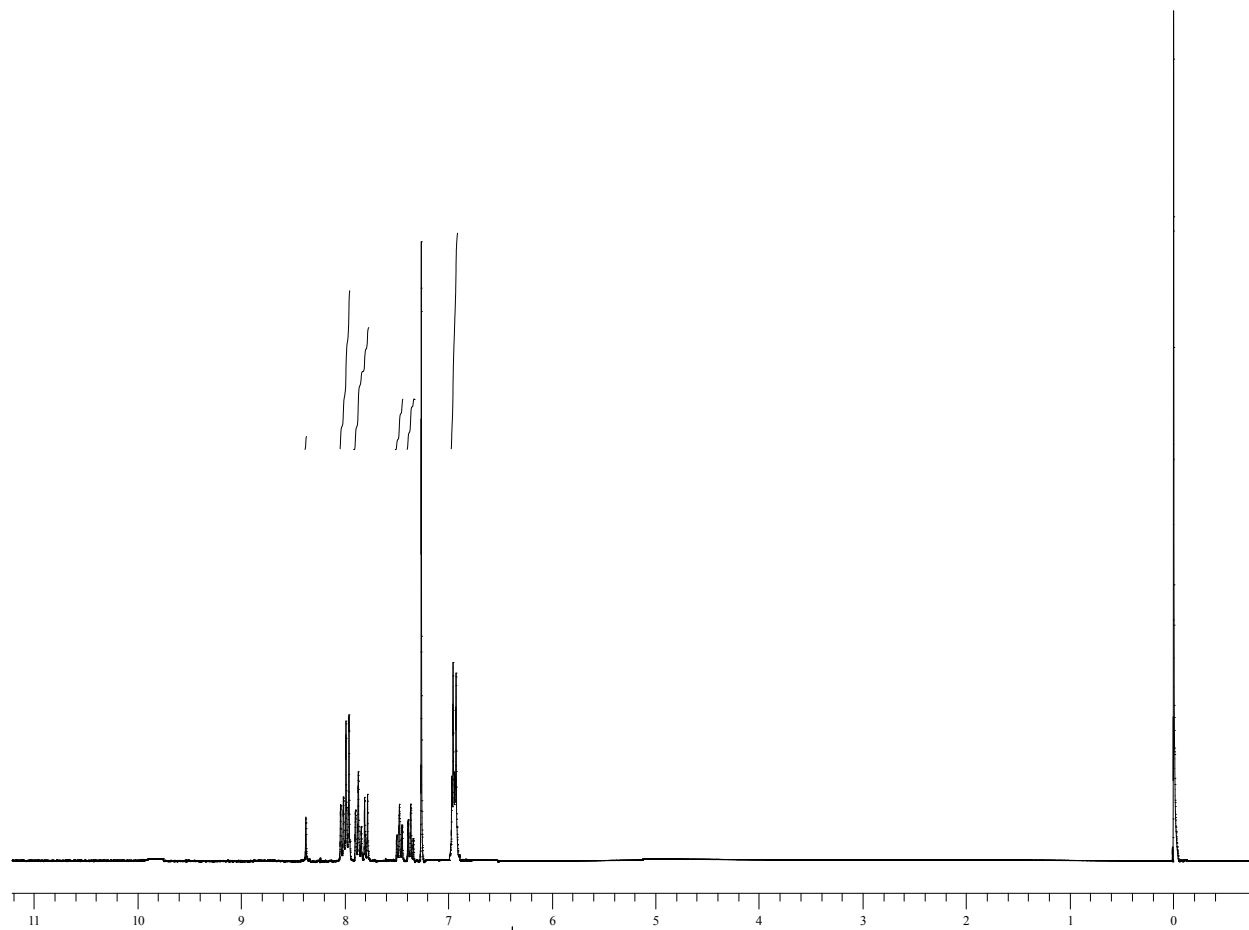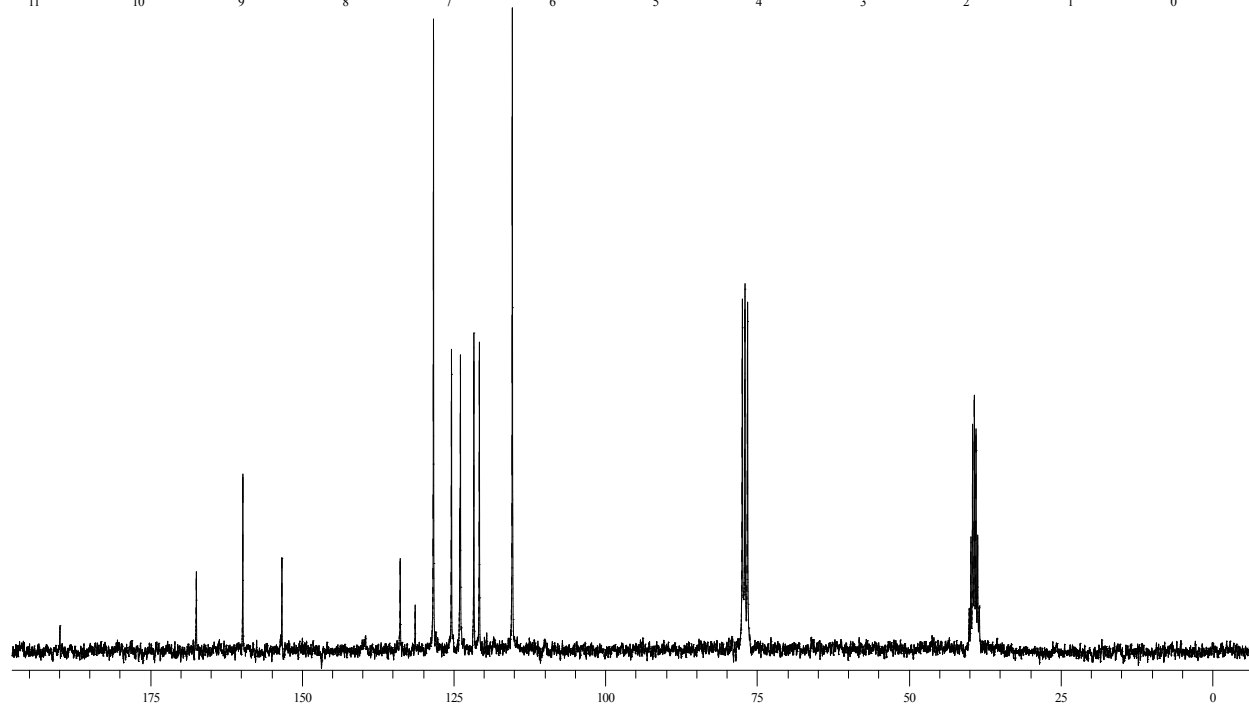



**Table 1, Entry 7**

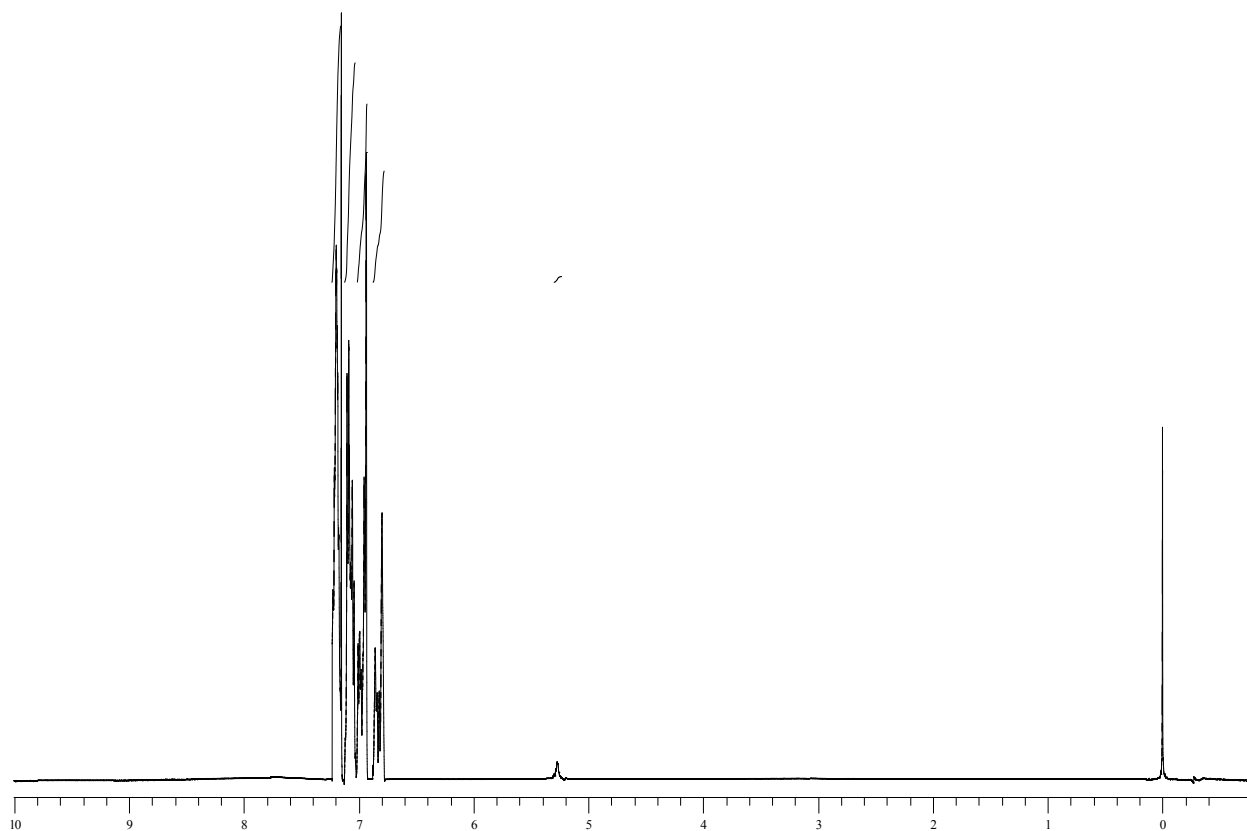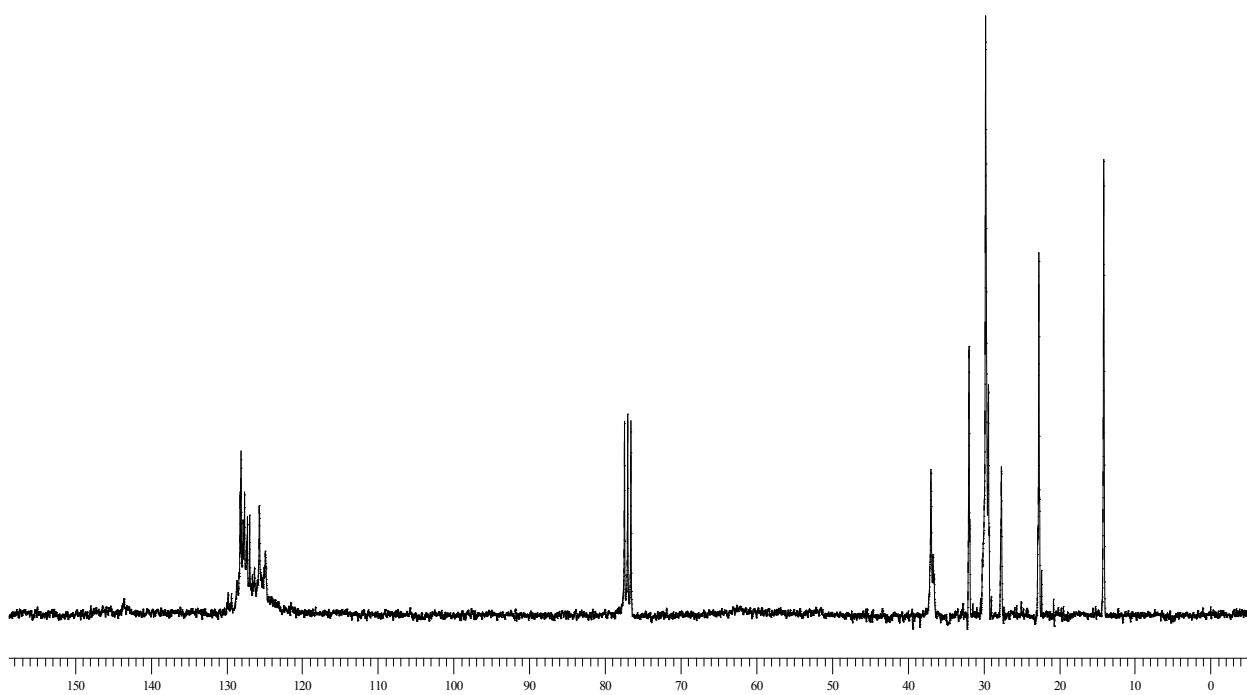

Table 1, Entry 8

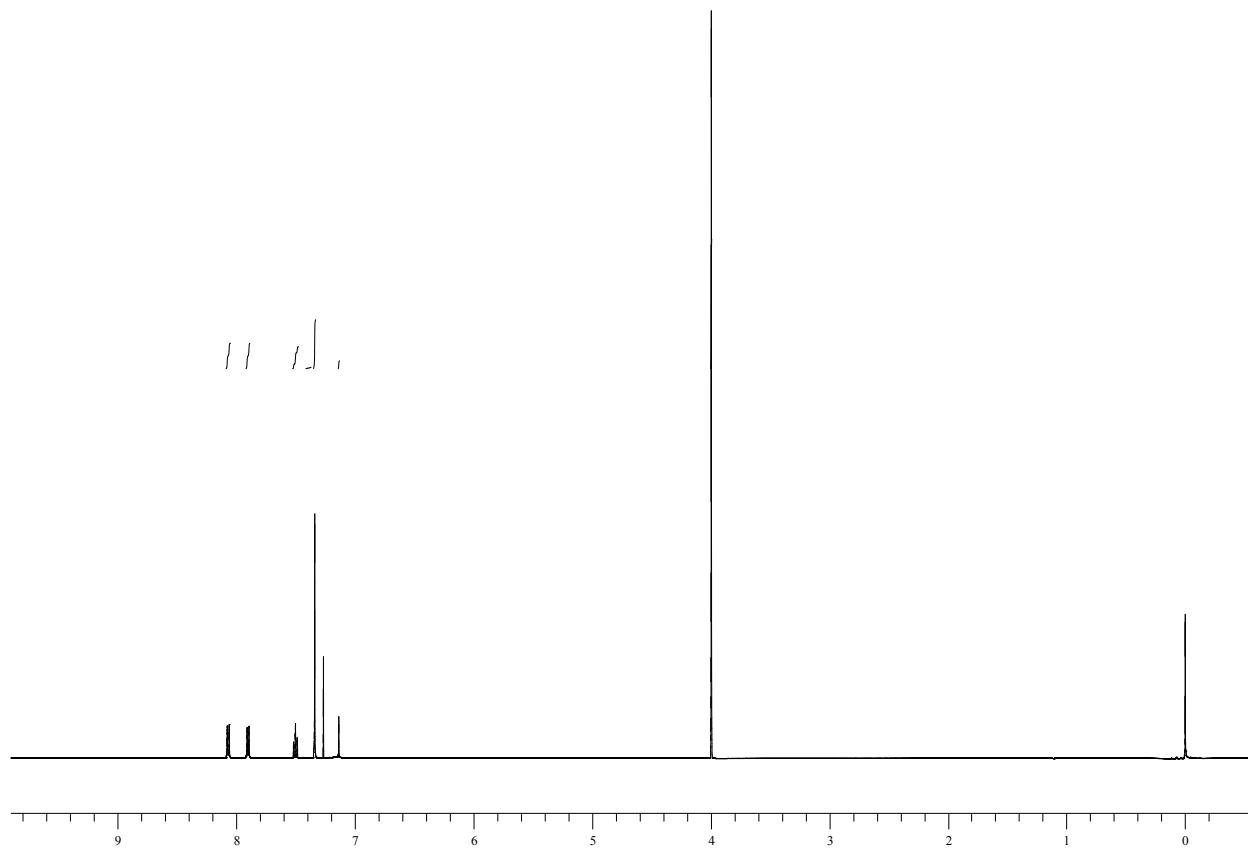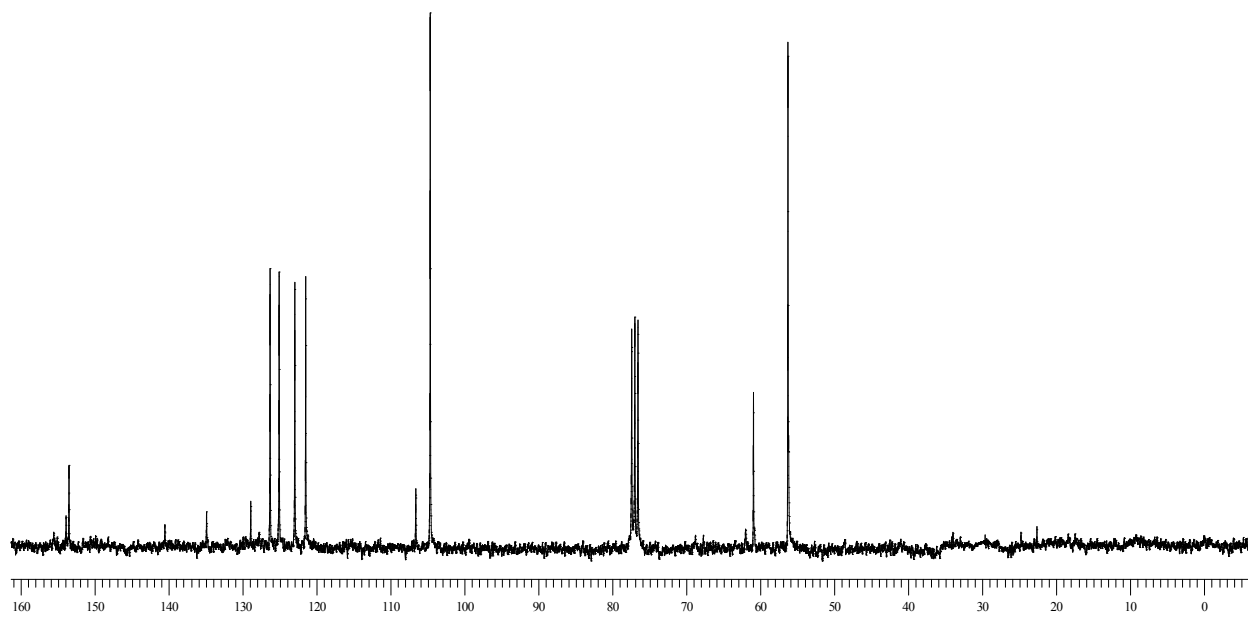

Table 1, Entry 9

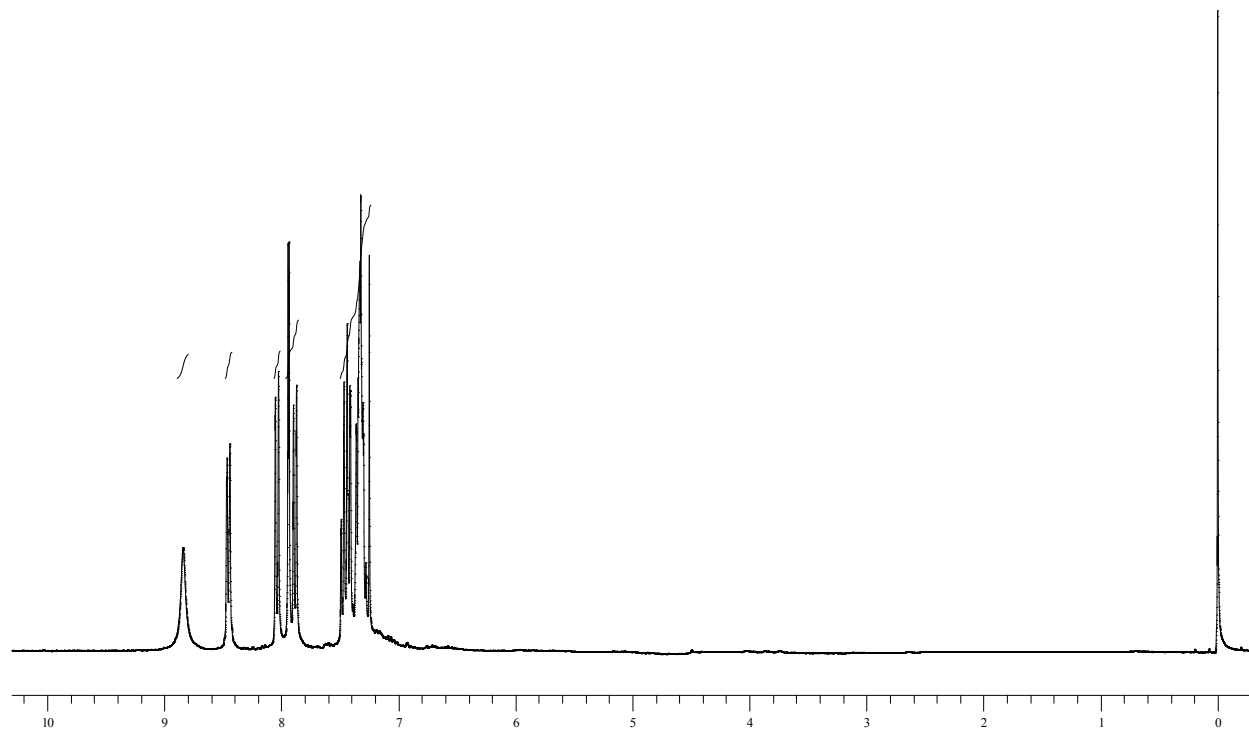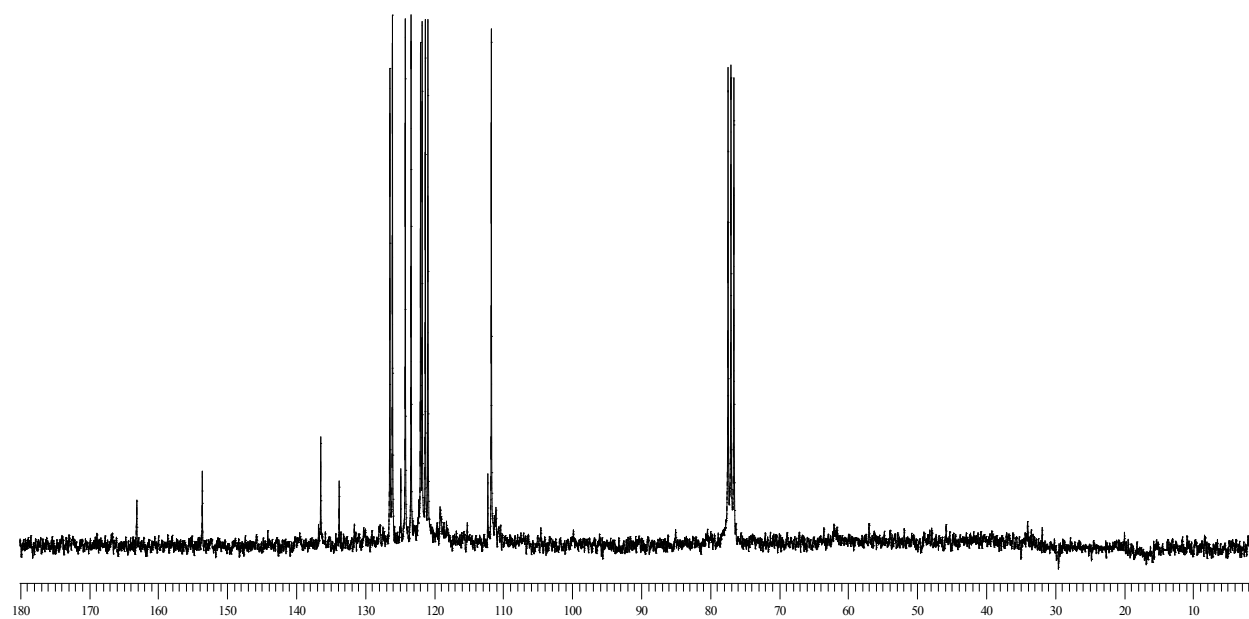

Table 1, Entry 11.

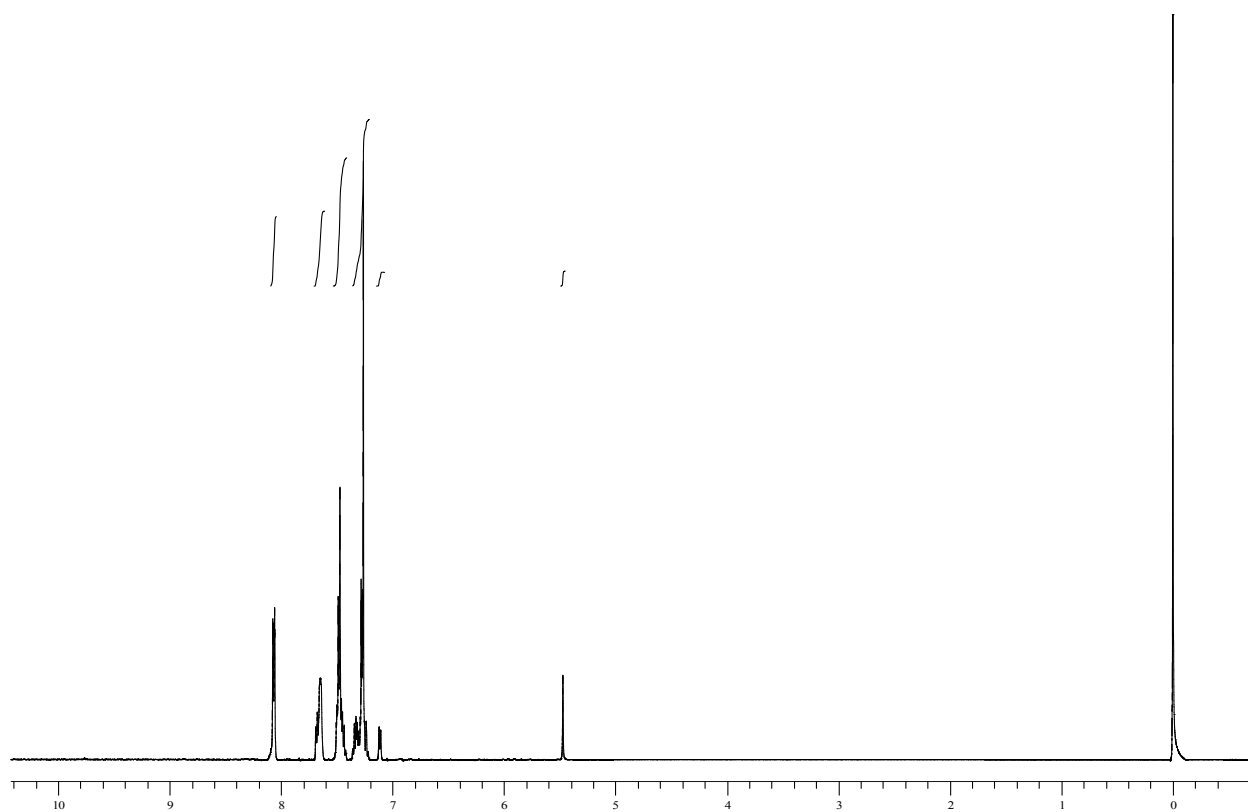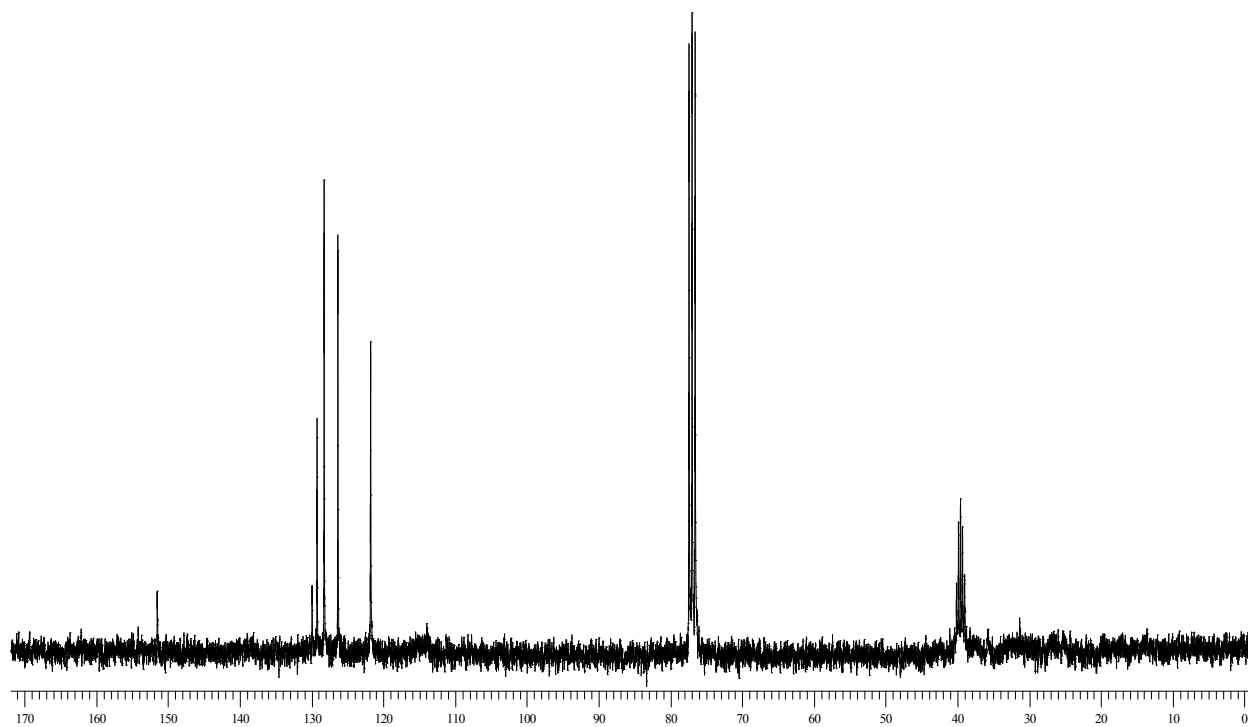

Table 1, Entry 12.

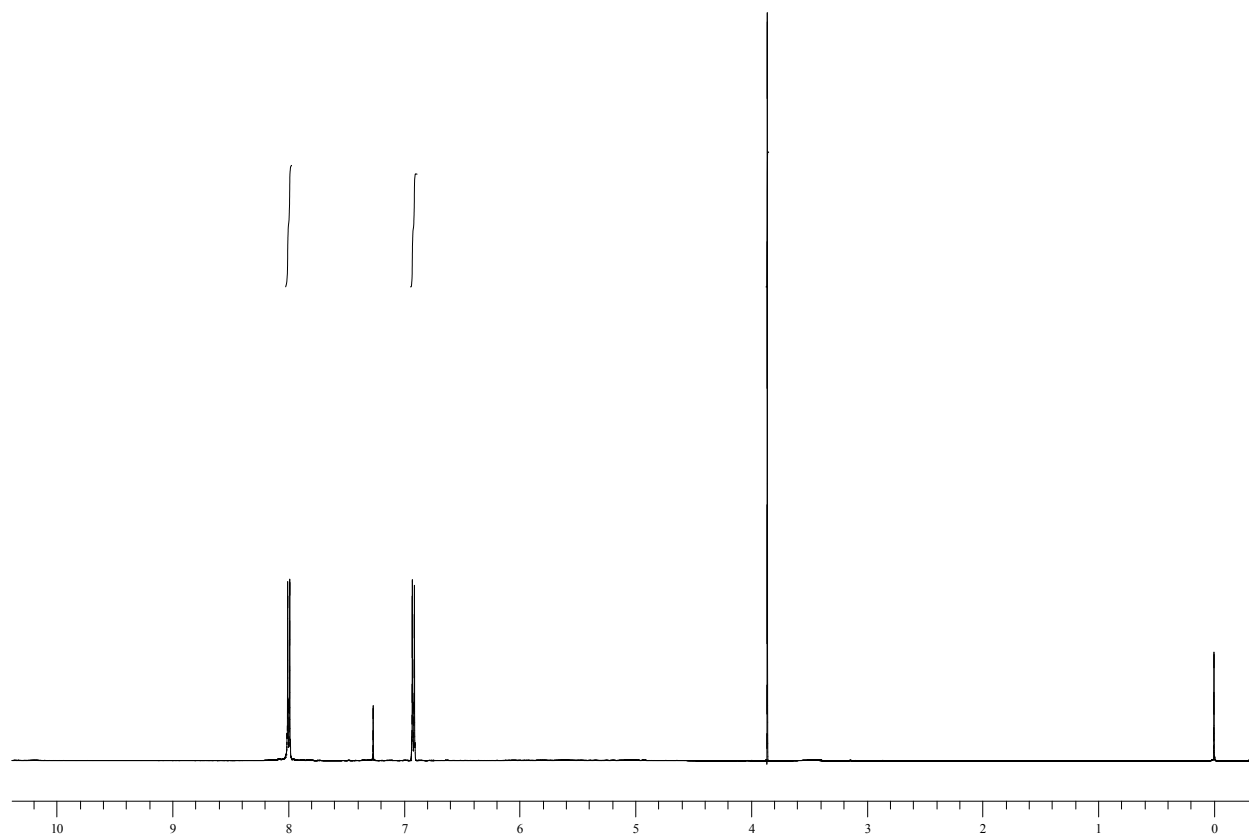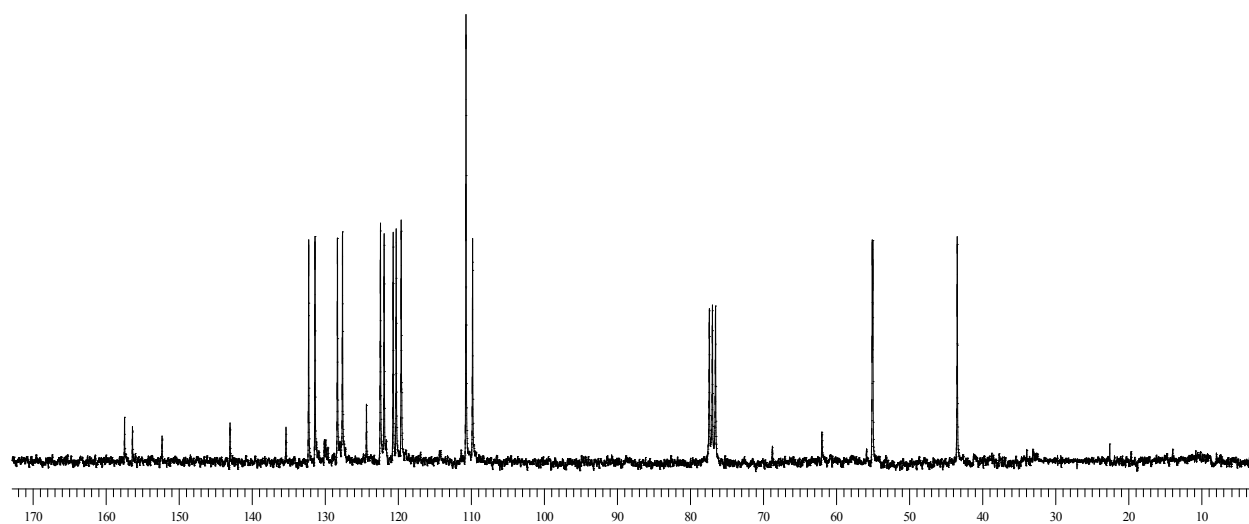

Table 1, Entry 13

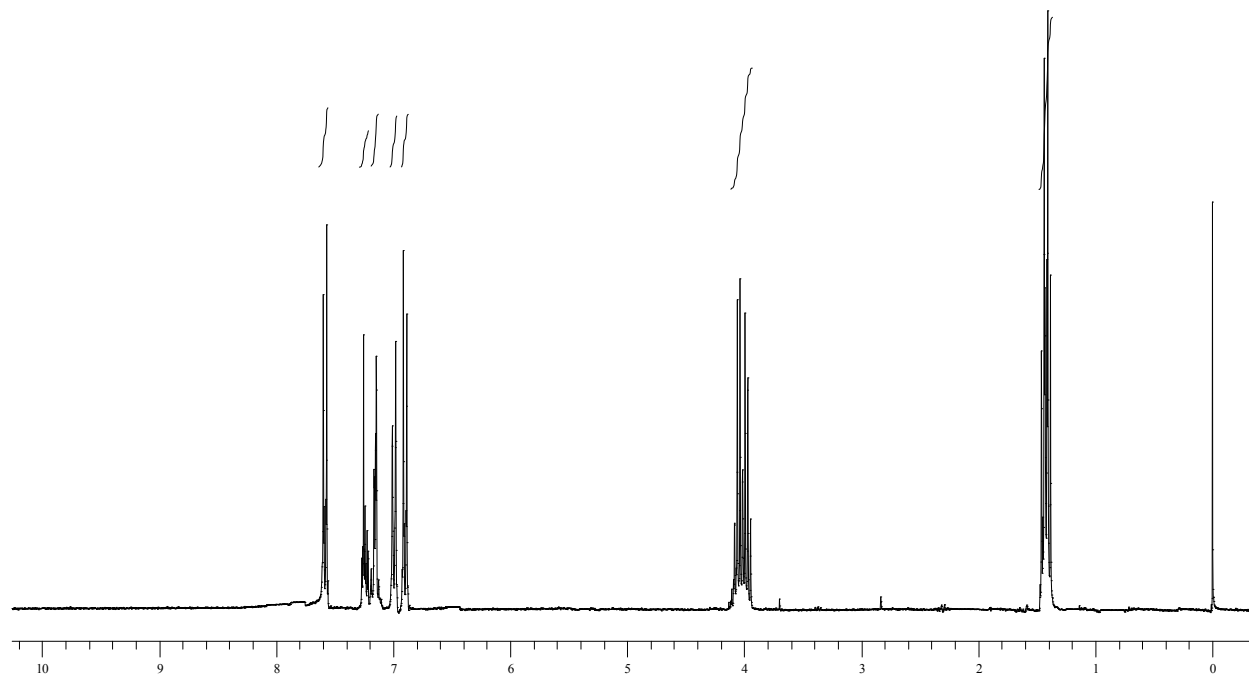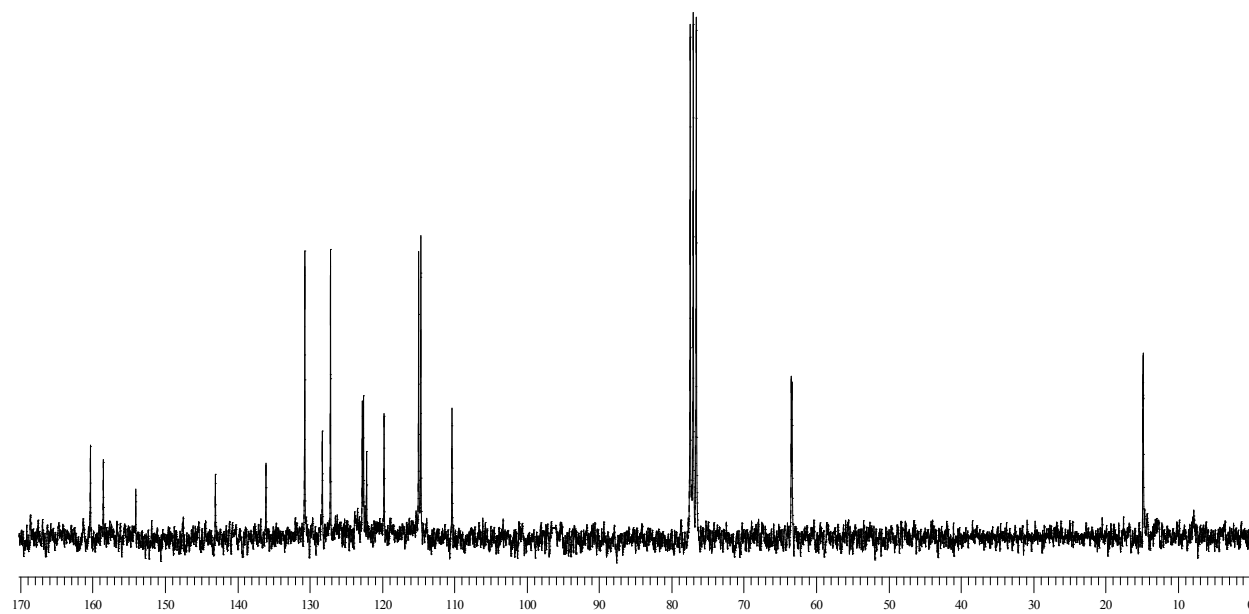

**Table 1, Entry 14**

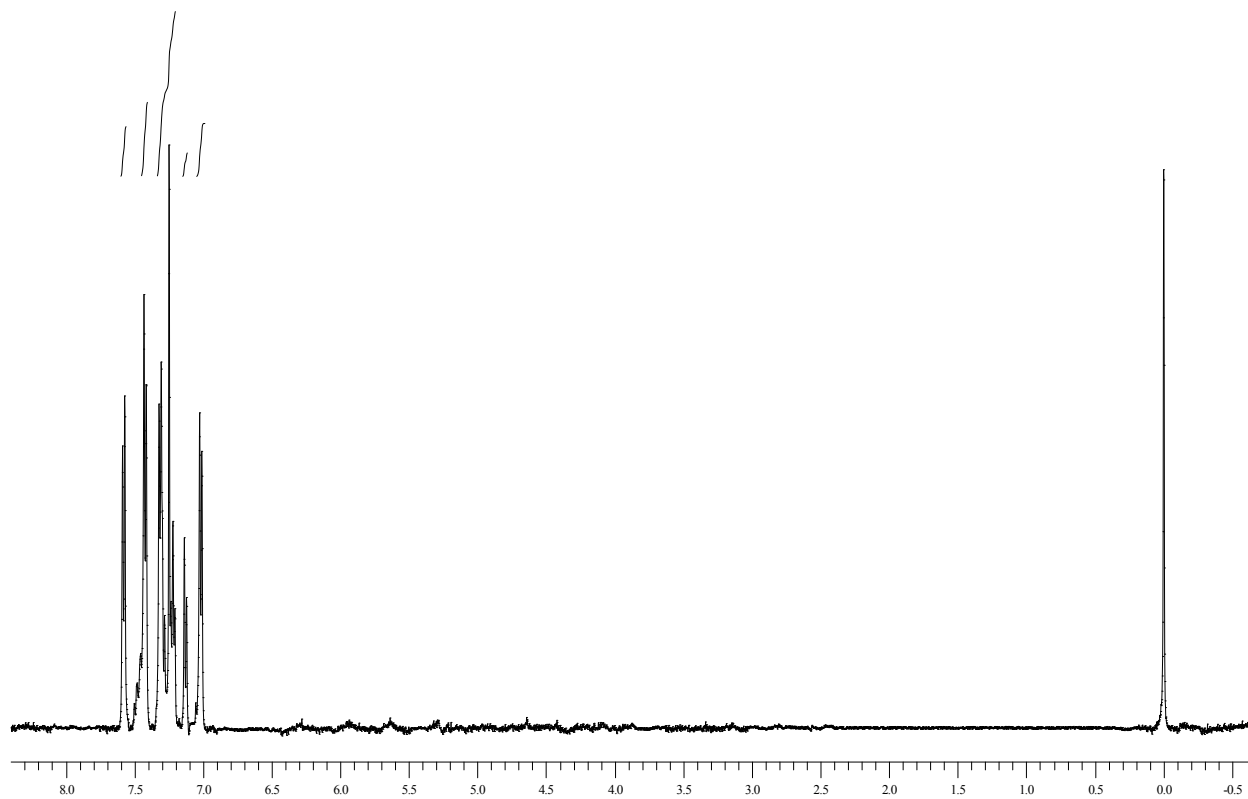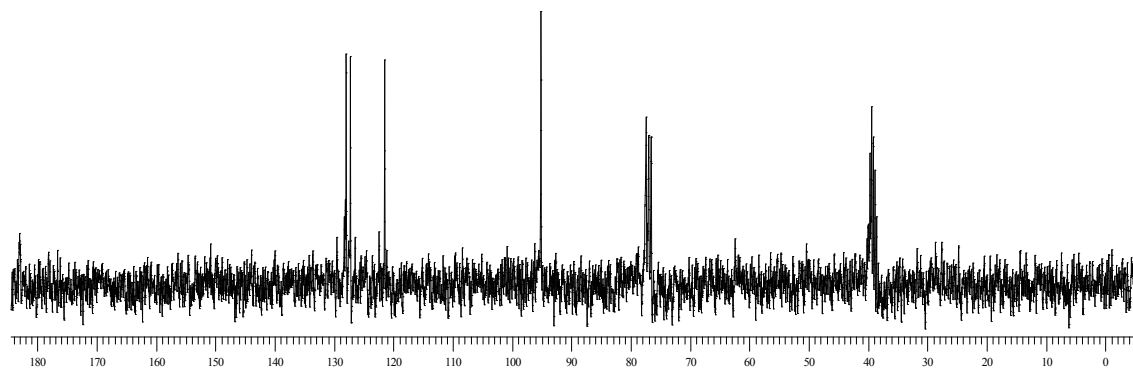

**Table 1, Entry 15**

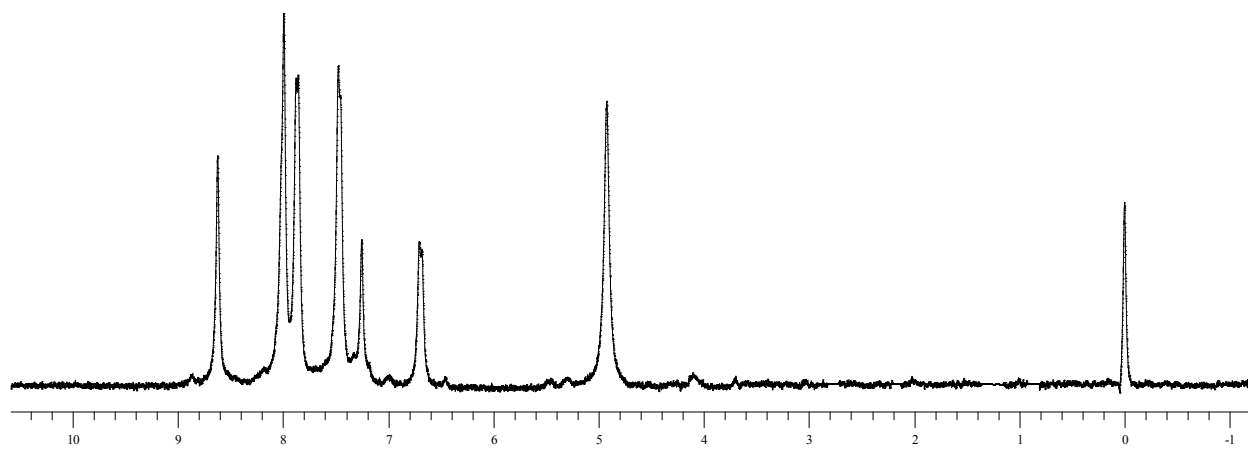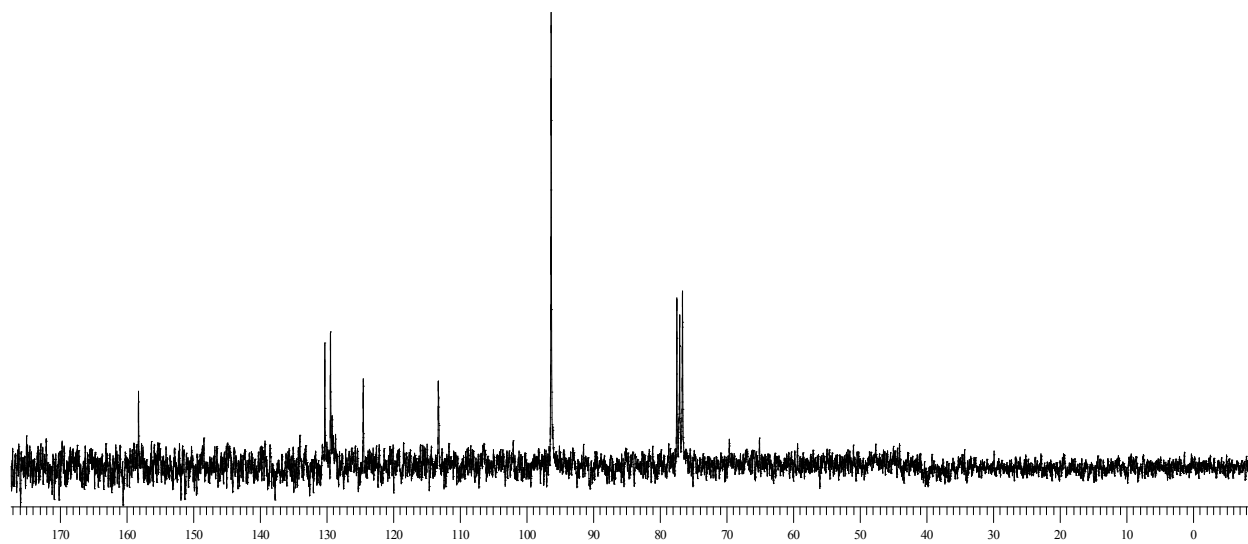



**Table 1, Entry 16**

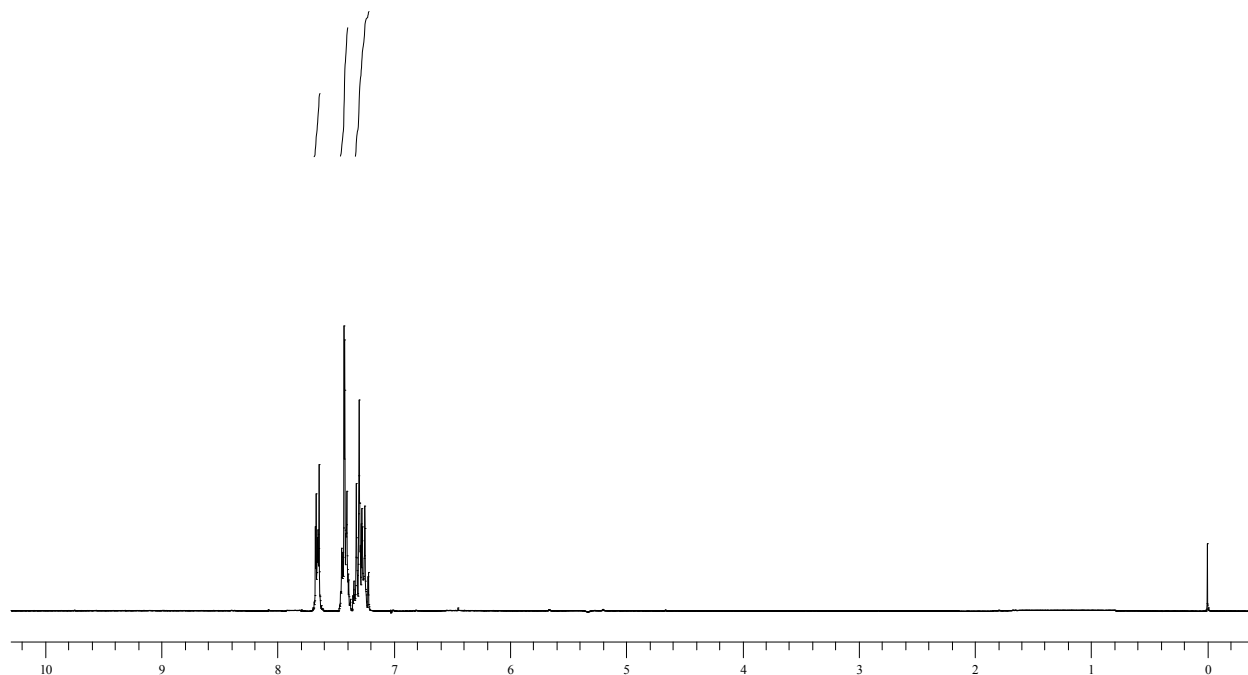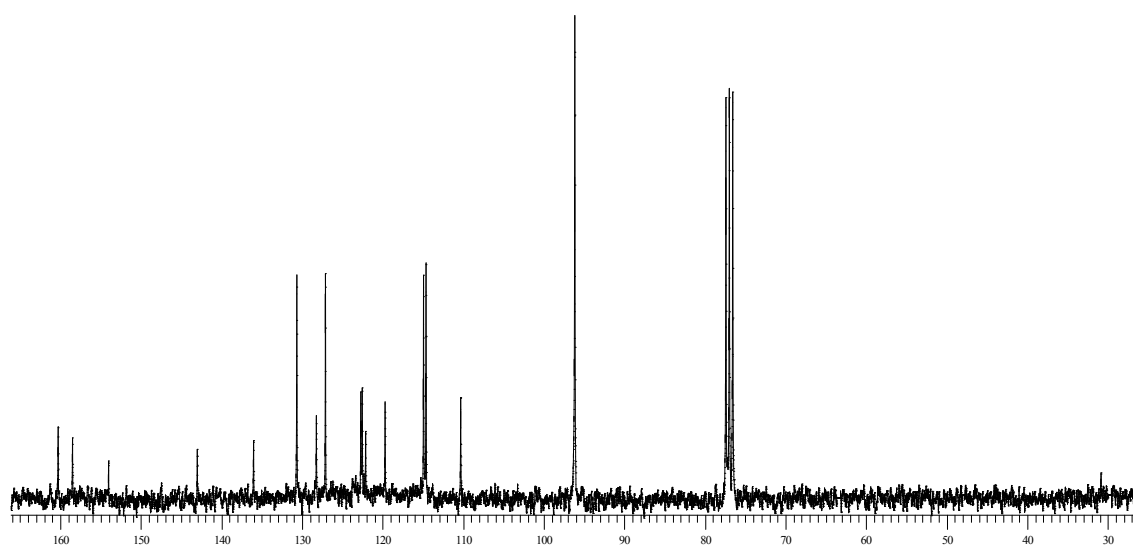

**Table 1, Entry 17**

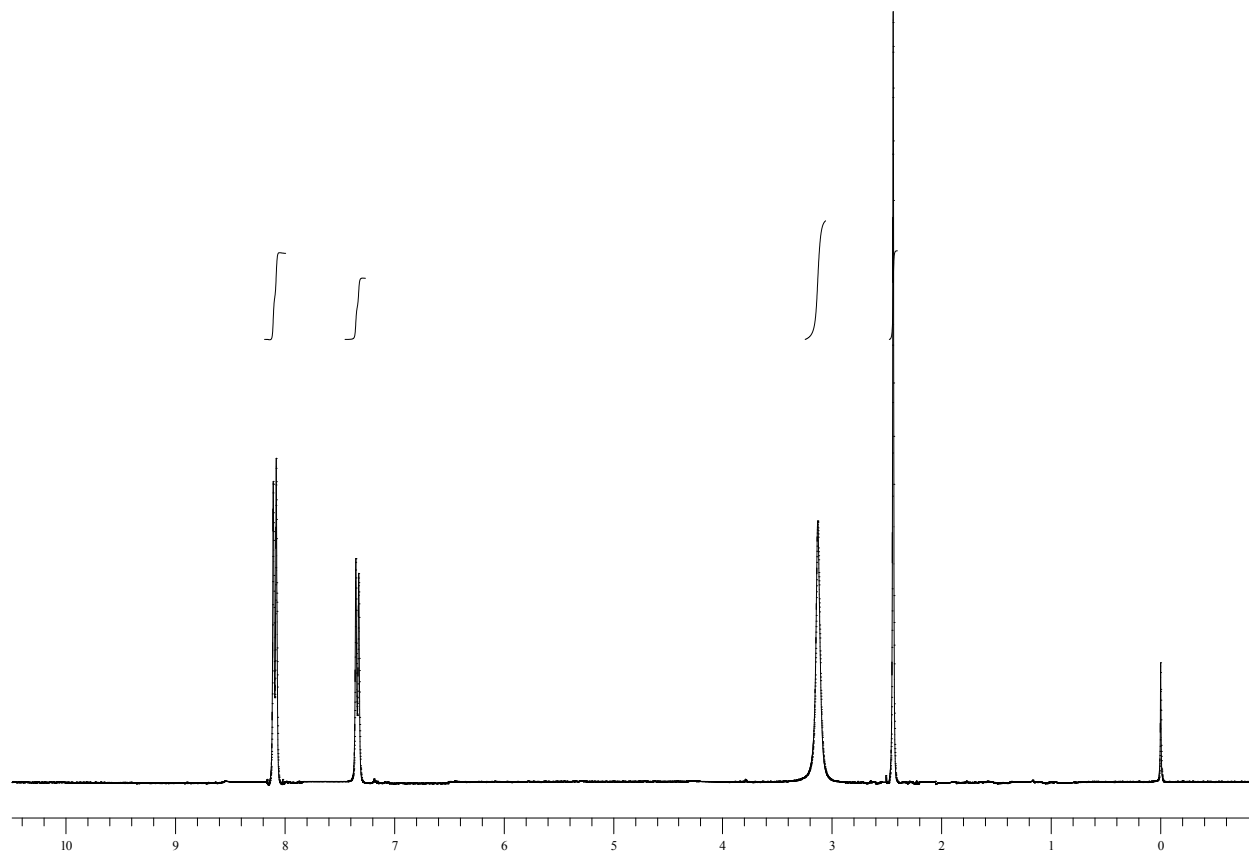

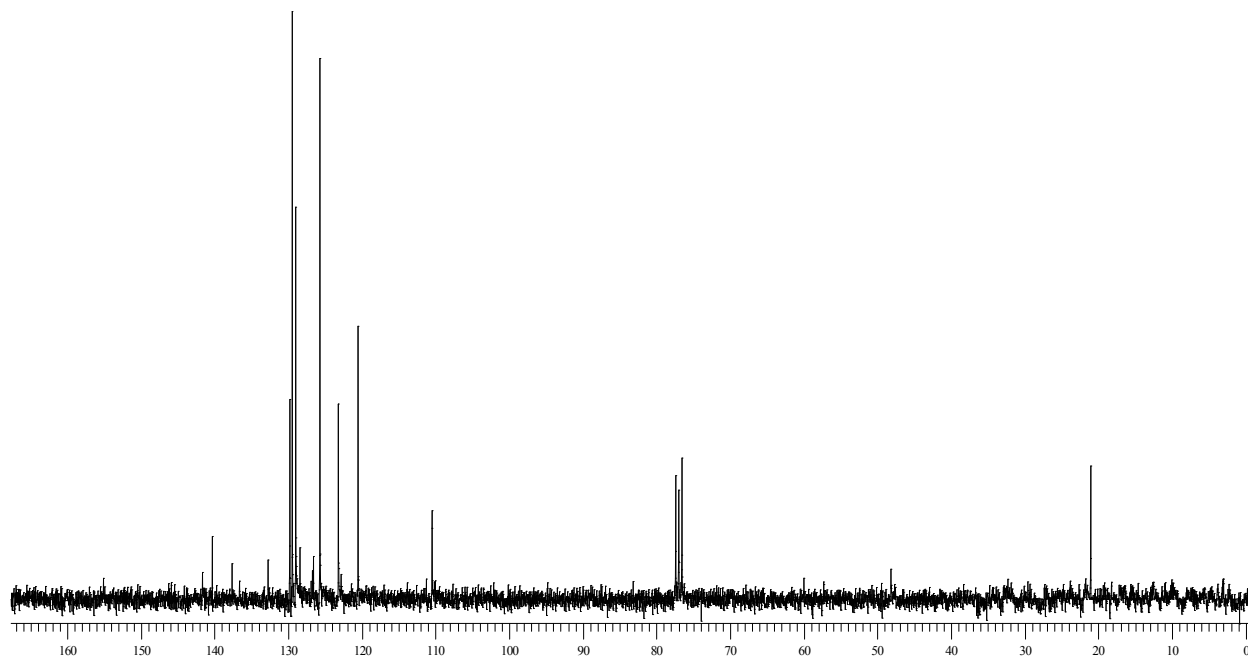

**Table 1, Entry 18**

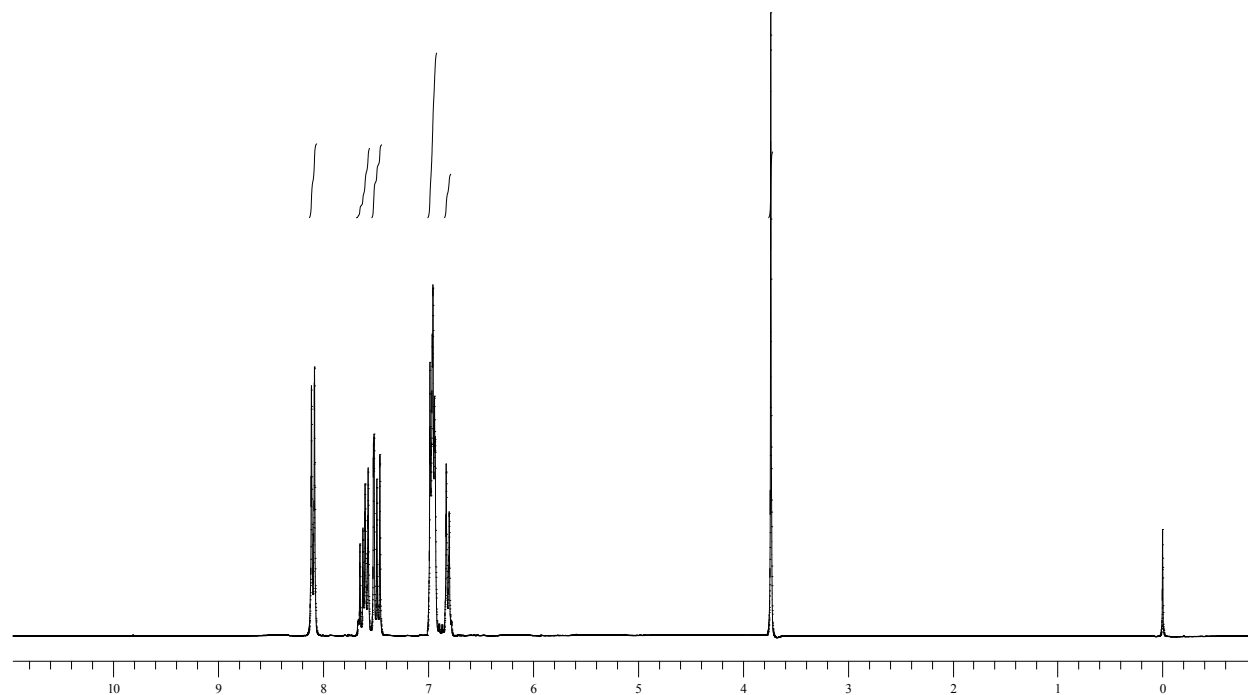

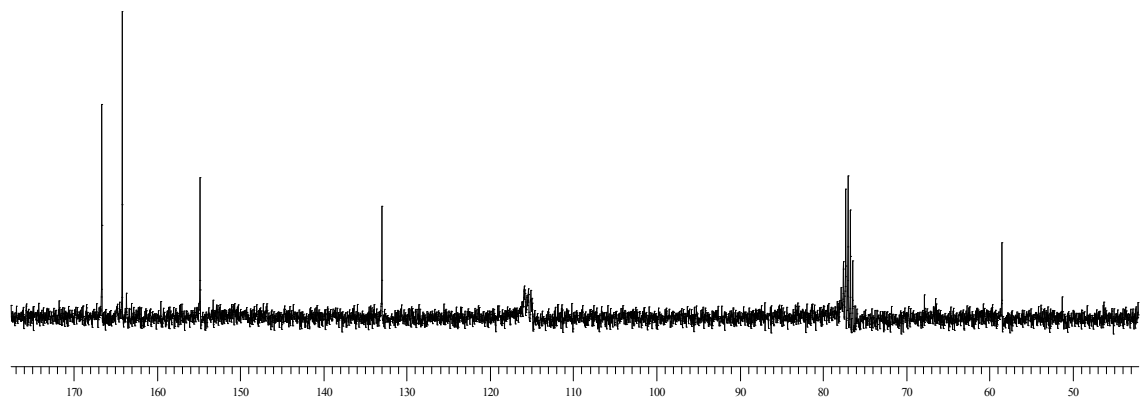

Supplement: c4ra16222f1.pdf [file c4ra16222f1.pdf]
